# Supplementary material for: Estradiol Suppresses TLR4-triggered Apoptosis of Decidual Stromal Cells and Drives an Anti-inflammatory TH2 Shift by Activating SGK1
Source: PubMed Central journal article supplement — Int J Biol Sci. 2017 Mar 11;13(4):434–48. doi: 10.7150/ijbs.18278 (PMC5436564; doi:10.7150/ijbs.18278), 2017-03-11
Supplement: ijbsv13p0434s1.pdf [file ijbsv13p0434s1.pdf]

1 **Supplementary Table S1.** Comparison of the demographic characteristics and laboratory  
2 traits of the study population.

| Variables                | Miscarriage group<br>(n=91) | Normal pregnancy control<br>(n=71) | <i>P</i> value |
|--------------------------|-----------------------------|------------------------------------|----------------|
| Age, years               | 29.87 ± 0.50                | 28.42 ± 0.74                       | 0.107          |
| BMI, kg/m <sup>2</sup>   | 21.07 ± 0.31                | 20.91 ± 0.29                       | 0.697          |
| Gestational age, weeks   | 8.02 ± 0.16                 | 7.73 ± 0.14                        | 0.166          |
| gravidity                | 1.26 ± 0.14                 | 1.39 ± 0.16                        | 0.528          |
| Parity (previous births) | 0.16 ± 0.04                 | 0.52 ± 0.07                        | < 0.001 ***    |
| Previous miscarriages    | 0.58 ± 0.08                 | 0.10 ± 0.05                        | < 0.001 ***    |

3 Notes: BMI, body mass index; E<sub>2</sub>, estradiol; P<sub>4</sub>, progesterone. Data are represented as mean ±  
4 SEM. Independent samples t-test was used, *P* < 0.05 was considered statistically significant (\**P* <  
5 0.05, \*\**P* < 0.01, \*\*\**P* < 0.001).  
6

7 **Supplementary Table S2.** Primers for quantitative real-time PCR.

| Genes          | GenBank<br>accession number | Primer sequence (5'-3')                                                        | Product<br>size (bp) |
|----------------|-----------------------------|--------------------------------------------------------------------------------|----------------------|
| Human SGK1     | NM_001143676.1              | TCATGCCAACATCCTGACCAA (Forward)<br>TGAATAAAGTCGTTTCAGACCCATCC<br>(Reverse)     | 102                  |
| Human IRF4     | U52682                      | CCAAGATTCCAGGTGACTC (Forward)<br>GGATTGCTGATGTGTTCTG (Reverse)                 | 176                  |
| Human PRL      | GQ305133                    | CATCCATAACCTCTCCTCAG (Forward)<br>TTGCTCCTCAATCTCTACAG (Reverse)               | 283                  |
| Human XIAP     | U45880                      | ACTCTACTACACAGGTATTGG (Forward)<br>TCAGAACTCACAGCATCAG (Reverse)               | 177                  |
| Human<br>GAPDH | AY340484                    | GGCTGAGAACGGGAAGCTTGTCAT<br>(Forward)<br>CAGCCTTCTCCATGGTGGTGAAGA<br>(Reverse) | 272                  |

8

## 9 Supplementary figure legends

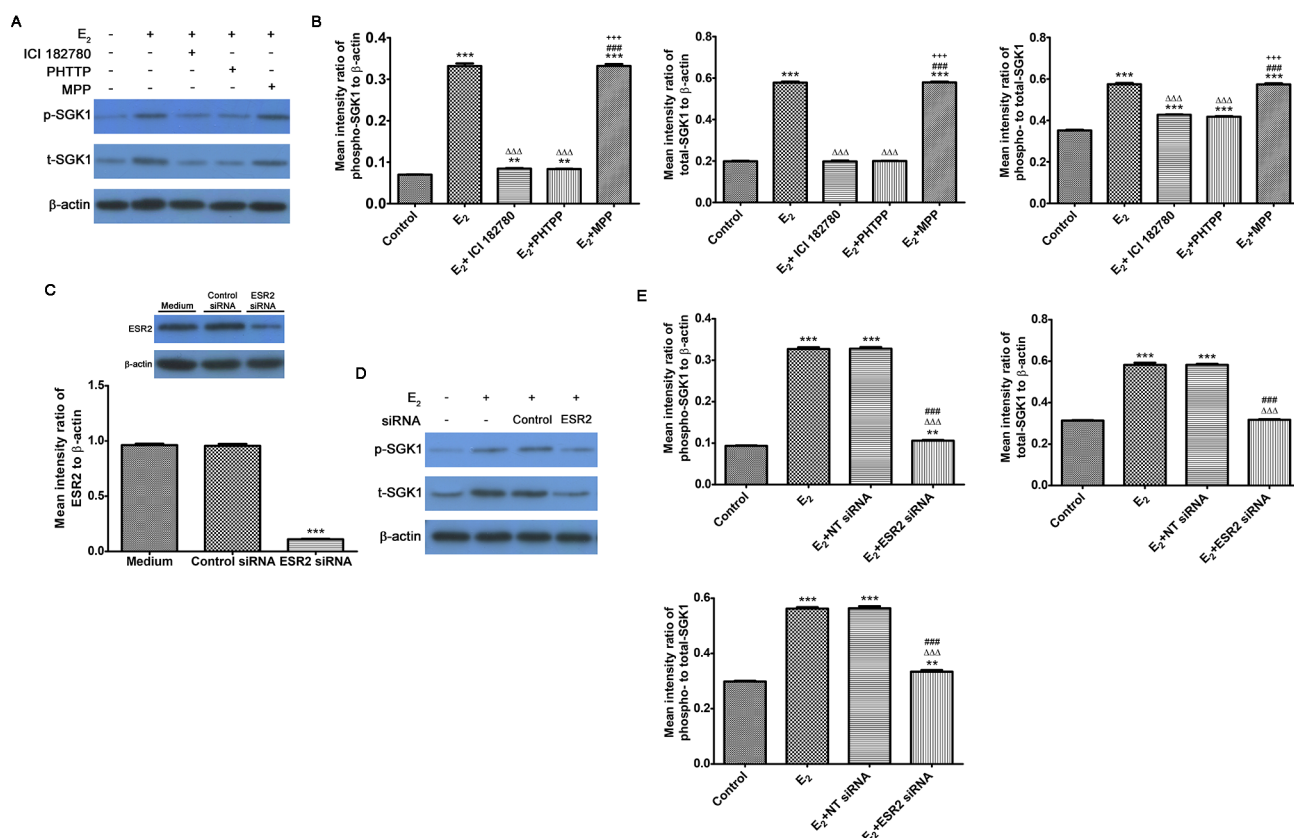

**Supplementary Figure S1 E<sub>2</sub> up-regulates SGK1 activity via estrogen receptor β (ERβ) in DSCs.** (A) Western blot analysis of DSCs treated with E<sub>2</sub> (10 nM) alone, E<sub>2</sub> plus ER antagonist ICI182780, E<sub>2</sub> plus ERβ antagonist PHTPP (1μM), or E<sub>2</sub> plus ERα antagonist MPP (1μM) for 24h. Blots were probed for phosphorylated SGK1 (p-SGK1), total-SGK1 (t-SGK1), and total β-actin. (B) Densitometric quantifications of p- and t-SGK1 to β-actin (left), and mean (SEM) ratio of phosphorylated to total (p/t) SGK1 protein (right). Western blot analysis of DSC lysates pretreated with *ESR2* (gene encoding ERβ)-specific and non-targeting negative control siRNA. Blots were probed with antibodies to ESR2 protein (C), p-SGK1, and t-SGK1 (D). β-actin was used as the loading control. (E) Densitometric quantification of p-SGK1 and t-SGK1 to β-actin (top), and mean (SEM) ratio of p/t SGK1 protein (bottom). Data are represented as arithmetic means ± SEM for 3 independent samples. \*\**P* < 0.01, \*\*\**P* < 0.001, compared with control group or medium group; ΔΔΔ*P* < 0.001, compared with E<sub>2</sub> group; ###*P* < 0.001, compared with E<sub>2</sub>+ICI 182780 group or E<sub>2</sub>+control siRNA group; +++*P* < 0.001, compared with E<sub>2</sub>+PHTPP group.

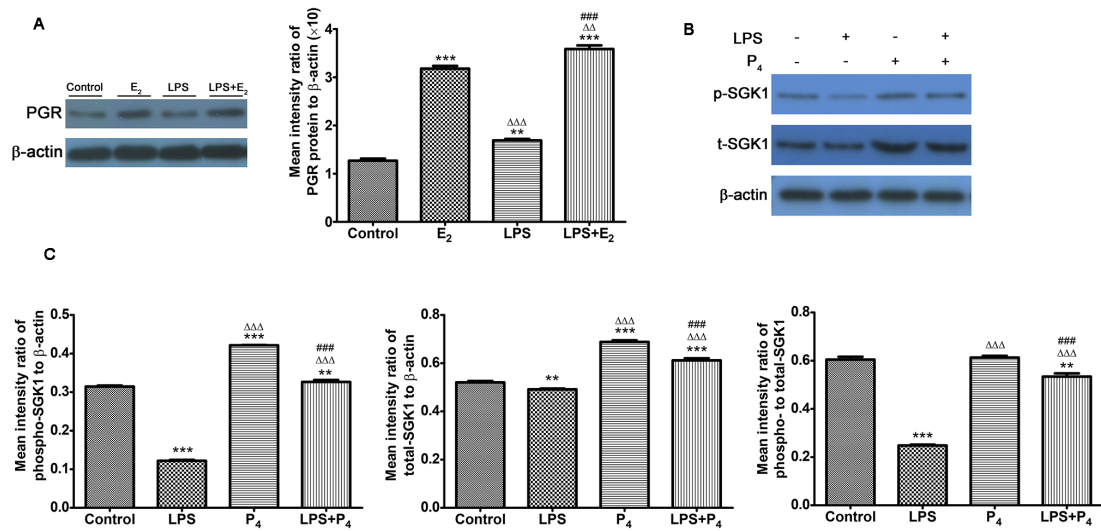

**Supplementary Figure S2 E<sub>2</sub> up-regulates progesterone receptor (PGR) expression, and progesterone (P<sub>4</sub>) influences SGK1 expression in DSCs.** (A) Western blot analysis (left) and quantification (right) of the PGR level relative to β-actin in DSCs treated with LPS (10 ng/mL), E<sub>2</sub> (10 nM) or E<sub>2</sub> plus LPS. (B) Immunoblot analysis to detect phosphorylated SGK1 (p-SGK1), total SGK1 (t-SGK1), and total β-actin in DSCs treated with LPS (10 ng/mL), P<sub>4</sub> (10 nM) or P<sub>4</sub> plus LPS. (C) Densitometric quantification of p-SGK1 and t-SGK1 to β-actin, and mean (SEM) ratio of p/t SGK1 protein (right). Data are represented as arithmetic means ± SEM for 3 independent samples. \*\* $P < 0.01$ , \*\*\* $P < 0.001$ , compared with control group or medium group;  $\Delta\Delta P < 0.01$ ,  $\Delta\Delta\Delta P < 0.001$ , compared with E<sub>2</sub> group or LPS group; ### $P < 0.001$ , compared with LPS group or P<sub>4</sub> group.
